# Supplementary material
Source: HighWire-hosted journal article supplement (https://www.cmaj.ca/highwire/filestream/75168/field_highwire_adjunct_files/0/191012-res-1-at.pdf)
Supplement: 191012-res-1-at.pdf [file 191012-res-1-at.pdf]

## **Appendix 1 (as supplied by the authors): Supplementary material content**

### **TABLES**

**Table 1. List of diagnostic codes for chronic inflammatory diseases**

**Table 2. List of diagnostic codes for hypertension and covariates**

**Table 3. Prednisolone equivalent dose conversion factors for oral glucocorticoids**

**Table 4. Description of prescribed hypertension inducing drugs during the study period**

**Table 5. Timing of diagnosis of the underlying chronic inflammatory diseases and description of oral glucocorticoid exposure during the study period**

**Table 6. Time-variant prescribed prednisolone-equivalent dose of oral glucocorticoids and the risk of hypertension further adjusted for flare status in the overall study population**

**Table 7. Time-variant prescribed prednisolone-equivalent dose of oral glucocorticoids and the risk of hypertension further adjusted for flare status by type of chronic inflammatory disease**

**Table 8. Time-variant prescribed prednisolone-equivalent dose of oral glucocorticoids and the risk of hypertension from mixed-effect models**

**Table 9. Time-variant prescribed prednisolone-equivalent dose of oral glucocorticoids and the risk of hypertension when the 29,968 patients for whom the duration of their underlying chronic disease was  $\geq 3$  months**

### **FIGURES**

**Figure 1. Study population flow chart**

**Figure 2. Schematic view of confounding adjustment for investigating the effects of oral glucocorticoids on hypertension**

### **METHODS**

**Table 1. List of diagnostic codes for chronic inflammatory diseases**

| Code type | List of codes                                                                                                                                                                                                                                                                                                                                                                                                                                                                        | Chronic inflammatory disease |
|-----------|--------------------------------------------------------------------------------------------------------------------------------------------------------------------------------------------------------------------------------------------------------------------------------------------------------------------------------------------------------------------------------------------------------------------------------------------------------------------------------------|------------------------------|
| Read      | J40z.00, J400200, J40..12, J401.00, J400500, J401000, J400100, J400.00, J08z900, J401100, ZR3S.11, ZR3S.00, J400z00, J40..11, J400300, J402.00, Jyu4000, J400400, J40z.11, J401z11, J401z00, N031100, J40..00, J4z2.00, J400000, J401200, J57yA00, J57y900, N031000, J41yz00, 41y100, J410400, J41y.00, J410200, J41z.00, J412.00, J410300, J410z00, Jyu4100, J410.00, J410100, J410000, J411.00, N045400, J41..12, J413.00, J41..00, J4...12, 8Cc5.11, 8CA4W00, 8Cc5.00,            | Inflammatory bowel disease   |
|           | 2G27.00 , 66H..13, F371200, F396400, G5y8.00, G5yA.00, H570.00, N005.00, N040.00, N040000, N040100, N040200, N040500, N040600, N040700, N040800, N040900, N040A00, N040B00, N040D00, N040F00, N040G00, N040H00, N040J00, N040K00, N040N00, N040P00, N040Q00, N040R00, N040S00, N040T00, N041.00, N042.00, N042100, N042200, N042z00, N047.00, N04X.00, N04y000, N04y011, N04y012, N04y200, Nyu1100, Nyu1200, Nyu1G00, N040L00, N040C00, N040400, Nyu1000, N040M00, N040E00, N040300, | Rheumatoid arthritis         |
|           | N20..00, N20..11                                                                                                                                                                                                                                                                                                                                                                                                                                                                     | Polymyalgia rheumatica       |
|           | N200.00, G755.00, G755z00                                                                                                                                                                                                                                                                                                                                                                                                                                                            | Giant cell arteritis         |
|           | G757.00, G757.12, G751000, G758.00, G754.11, G754.00, G752112, G752111, C332100, D310100, D310000, D310011, G750.00, F371100, F396300, K01x300, G75..00, G75z.00, F421E00, G76B.00, N040N00, N012700, N012011, N012000, N012.00, K425200, N012x00, AD61.00                                                                                                                                                                                                                           | Vasculitis                   |
|           | M154.00, M154z00, N000.00, N000400, N000000, K01x411, M154700, N000300, H57y400, N000200, K0B4000, N000z00, F371000, ZRq9.00, K01x400,                                                                                                                                                                                                                                                                                                                                               | Systemic lupus erythematosus |

---

ZRq8.00, N000100, Nyu4300,  
ZRq9.11

**ICD 10**

---

K50.0, K50.1, K50.8, K50.9, M07.4,  
M09.1, K51.0, K51.1, K51.2, K51.3, Inflammatory bowel disease  
K51.5, K51.8, K51.9, M07.5, M09.2

---

I52.8, J99.0, M05.0, M05.1, M05.2,  
M05.3, M05.8, M05.9, M06.0, Rheumatoid arthritis  
M06.1, M06.2, M06.3, M06.8, M06.9

---

M35.3, M31.5 Polymyalgia rheumatica

---

M31.5, M31.6 Giant cell arteritis

---

M31.4, M30.3, M30.1, M31.3, D69.0,  
M30, M30.0, M30.8, M31.7, H35.0, Vasculitis  
M05.29, M05.24, M05.27, M05.21,  
M05.28, M05.26, M05.2, M05.23,  
M05.22, M05.25, M05.20, M35.2

---

M32.0, M32.1, M32.8, M32.9 Systemic lupus erythematosus

---

Note: CPRD = Clinical Research Data link, HES = Hospital Episode Statistics, ICD = International Classification of Diseases

**Table 2. List of diagnostic codes for hypertension and covariates**

| Disease                                    | Code type     | List of codes                                                                                                                                                                                                                                                                                                                                                                                                                                                                                                                                                                                                            |
|--------------------------------------------|---------------|--------------------------------------------------------------------------------------------------------------------------------------------------------------------------------------------------------------------------------------------------------------------------------------------------------------------------------------------------------------------------------------------------------------------------------------------------------------------------------------------------------------------------------------------------------------------------------------------------------------------------|
| <b>Hypertension</b>                        | <b>Read</b>   | F282.00, F404200, F421300, G2...00, G2...11, G20..00, G20..11, G20..12, G200.00, G201.00, G202.00, G203.00, G20z.00, G20z.11, G21..00, G210.00, G210000, G210100, G210z00, G211.00, G211000, G211100, G211z00, G21z.00, G21z000, G21z011, G21z100, G21zz00, G22..00, G220.00, G221.00, G222.00, G22z.00, G22z.11, G23..00, G230.00, G231.00, G232.00, G233.00, G23z.00, G25..00, G25..11, G26..00, G26..11, G27..00, G28..00, G2y..00, G2z..00, G672.00, G672.11, Gyu2.00, G22z.11, <b>G24..00, G240.00, G240000, G240z00, G241.00, G241000, G241z00, G244.00, G24z.00, G24z000, G24z100, G24zz00</b> , Gyu2000, Gyu2100 |
|                                            | <b>ICD 10</b> | I10.X, I11.0, I11.9, I1.2, I12.0, I12.9, I13, I13.0, I13.1, I13.2, I13.9, O11.X, <b>I15, I15.0, I15.1, I15.2, I15.8, I15.9</b>                                                                                                                                                                                                                                                                                                                                                                                                                                                                                           |
| <b>Scleroderma</b>                         | <b>Read</b>   | F396600, H572.00, KOH..00, KOJ0.00, M210.00, M210000, M210400, M210z00, N001.00, N001.12, N001000, Nyu4500, N001100                                                                                                                                                                                                                                                                                                                                                                                                                                                                                                      |
|                                            | <b>ICD 10</b> | L94.0, L94.1, M34, M34.0, M34.8, M34.9                                                                                                                                                                                                                                                                                                                                                                                                                                                                                                                                                                                   |
| <b>Stage 3 or 4 chronic kidney disease</b> | <b>Read</b>   | 1Z12.00, 1Z13.00, 1Z14.00, 1Z15.00, 1Z16.00, 1Z1B.00, 1Z1C.00, 1Z1D.00, 1Z1E.00, 1Z1F.00, 1Z1G.00, 1Z1H.00, 1Z1J.00, 1Z1K.00, 1Z1L.00, 4I29.00, 7L1A100, 7L1A200, 7L1A400, 7L1A500, 7L1A600, 7L1A.11, 7L1B000, 7L1B.00, 7L1B100, 7L1B200, 7L1C000, 7L1f000, 8882, G72C.00, K04E.00, K050.00, K05..12, K053.00, K054.00, K055.00, K0D..00, SP01500, SP05613, SP06B00, SP0E.00, SP0F.00, SP0G.00, SP0H.00, Gy1..00, Gy2..00, Gy3..00, Gy4..00, Gy5..00, TA02000, TA22000, TB11.00, TB11.11, Z91A.00, ZVu3G00                                                                                                               |
|                                            | <b>ICD 10</b> | N18                                                                                                                                                                                                                                                                                                                                                                                                                                                                                                                                                                                                                      |

Note: ICD = International Classification of Diseases. Codes in blue were used to define secondary hypertension.

**Table 3. Prednisolone equivalent dose conversion factors for oral glucocorticoids**

| Type of glucocorticoid | 10mg prednisolone equivalent, mg |
|------------------------|----------------------------------|
| Betamethasone          | 1.5                              |
| Beclomethasone         | 0.96                             |
| Budesonide             | 1.09                             |
| Cortisone              | 50                               |
| Deflazacort            | 12                               |
| Dexamethasone          | 1.5                              |
| Hydrocortisone         | 40                               |
| Methylprednisolone     | 8                                |
| Prednisone             | 10                               |
| Triamcinolone          | 8                                |

**Table 4. Description of prescribed hypertension inducing drugs during the study period**

| <b>Medication use*, n (%)</b>           | <b>Overall<br/>(N=71,642)</b> | <b>No. of patients<br/>with incident<br/>hypertension<br/>(N=24,896)</b> | <b>No. of patients<br/>without incident<br/>hypertension<br/>(N=46,746)</b> |
|-----------------------------------------|-------------------------------|--------------------------------------------------------------------------|-----------------------------------------------------------------------------|
| Selective serotonin reuptake inhibitors | 14,200 (19.8)                 | 3385 (13.6)                                                              | 10,815 (23.1)                                                               |
| Tricyclic antidepressants               | 15,253 (21.3)                 | 4762 (19.1)                                                              | 10,491 (22.4)                                                               |
| Oral oestrogen                          | 6518 (9.1)                    | 930 (3.7)                                                                | 5588 (12.0)                                                                 |
| Hormone replacement therapy             | 6960 (9.7)                    | 2736 (11.0)                                                              | 4224 (9.0)                                                                  |
| Cyclosporine                            | 419 (0.6)                     | 133 (0.5)                                                                | 286 (0.6)                                                                   |
| Leflunomide                             | 1488 (2.1)                    | 479 (1.9)                                                                | 1009 (2.2)                                                                  |
| Mycophenolate mofetil                   | 285 (0.4)                     | 57 (0.2)                                                                 | 228 (0.5)                                                                   |
| Non-steroidal anti-inflammatory drugs   | 45,144 (63.0)                 | 16,394 (65.9)                                                            | 28,750 (61.5)                                                               |
| <b>Any hypertensive medication</b>      | <b>52,711 (73.6)</b>          | <b>18,370 (73.8)</b>                                                     | <b>34,341 (73.5)</b>                                                        |

\*Defined as 1 or more prescriptions at any time during the study follow-up

**Table 5. Timing of diagnosis of the underlying chronic inflammatory diseases and description of oral glucocorticoid exposure during the study period**

| <b>Chronic inflammatory disease</b> | <b>Diagnosed before the start of follow-up (%)<br/>*</b> | <b>Diagnosed at follow-up start (%)</b> | <b>Mean (SD) cumulative PED in mg</b> | <b>Median (P25-P75) cumulative PED in mg</b> | <b>Median (P25-P75) duration of glucocorticoid exposure in years</b> |
|-------------------------------------|----------------------------------------------------------|-----------------------------------------|---------------------------------------|----------------------------------------------|----------------------------------------------------------------------|
| Inflammatory bowel disease          | 14,560 (57.9)                                            | 10,602 (42.1)                           | 2591 (7447)                           | 0 (0-1691)                                   | 6.6 (2.6-11.9)                                                       |
| Rheumatoid arthritis                | 9437 (46.7)                                              | 10,777 (53.3)                           | 3044 (8107)                           | 0 (0-1614)                                   | 5.8 (2.5-11.0)                                                       |
| Polymyalgia rheumatica              | 3117 (20.5)                                              | 12,128 (79.6)                           | 4364 (7957)                           | 1209 (0-5665)                                | 6.1 (2.6-11.4)                                                       |
| Giant cell arteritis                | 724 (22.5)                                               | 2495 (77.5)                             | 4410 (7851)                           | 635 (0-6226)                                 | 6.6 (2.8-11.8)                                                       |
| Vasculitis                          | 1453 (32.5)                                              | 3020 (67.5)                             | 3137 (8621)                           | 0 (0-584)                                    | 6.6 (2.6-11.8)                                                       |
| Systemic lupus erythematosus        | 1703 (51.2)                                              | 1626 (48.8)                             | 2608 (8147)                           | 0 (0-886)                                    | 6.4 (2.7-11.5)                                                       |
| <b>All diseases</b>                 | <b>30,994 (43.3)</b>                                     | <b>40,648 (56.7)</b>                    | <b>3204 (7898)</b>                    | <b>0 (0-2865)</b>                            | <b>6.6 (2.6-11.9)</b>                                                |

Note: PED = prednisolone-equivalent dose, P25 = 25<sup>th</sup> centile, P75 = 75<sup>th</sup> centile.

\*Median duration from date of diagnosis until date of entry was 5 years (P25=1.7, P75=10.6) and mean duration was 7.6 years (SD=8)

**Table 6. Time-variant prescribed prednisolone-equivalent dose of oral glucocorticoids and the risk of hypertension further adjusted for flare status in the overall study population**

| Dose exposure                               | HRs (95% CI)*†   | HRs (95% CI) *‡  |
|---------------------------------------------|------------------|------------------|
| <b>Daily dose category, mg</b>              |                  |                  |
| Non-use (Ref.)                              | 1                | 1                |
| >0–4.9                                      | 0.97 (0.90-1.05) | 0.98 (0.91-1.06) |
| 5.0–7.4                                     | 0.95 (0.86-1.06) | 1.02 (0.94-1.12) |
| ≥7.5                                        | 0.95 (0.84-1.08) | 1.09 (1.00-1.20) |
| <b>Overall cumulative dose category, mg</b> |                  |                  |
| Non-use (Ref.)                              | 1                | 1                |
| >0–959.9                                    | 1.14 (1.09-1.14) | 1.14 (1.09-1.19) |
| 960–3054.9                                  | 1.22 (1.15-1.28) | 1.21 (1.15-1.21) |
| ≥3055                                       | 1.33 (1.27-1.38) | 1.32 (1.27-1.37) |

\*Models were adjusted for age, index of multiple deprivation, non-oral glucocorticoids (inhaled, nasal, intra-muscular, intra-articular, topical or rectal), comorbidities (cardiovascular disease, chronic kidney disease and scleroderma), type of chronic inflammatory diseases and time-variant flare status

†Flare status defined as an increase in daily dose by >5mg, or a c-reactive protein (CRP) measurement ≥10mg/mL, or an erythrocyte sedimentation rate (ESR) ≥30mm/h

‡Flare status defined on an increase in daily dose by >10mg, or a CRP measurement ≥10mg/mL, or ESR≥30mm/h



**Table 7. Time-variant prescribed prednisolone-equivalent dose of oral glucocorticoids and the risk of hypertension further adjusted for flare status by type of chronic inflammatory disease**

| Dose exposure                               | Inflammatory bowel disease | Rheumatoid arthritis | Polymyalgia rheumatica | Giant cell arteritis | Vasculitis       | Systemic lupus erythematosus |
|---------------------------------------------|----------------------------|----------------------|------------------------|----------------------|------------------|------------------------------|
|                                             | HRs (95% CI)*†             | HRs (95% CI)*†       | HRs (95% CI)*†         | HRs (95% CI)*†       | HRs (95% CI)*†   | HRs (95% CI)*†               |
| <b>Daily dose category, mg</b>              |                            |                      |                        |                      |                  |                              |
| Non-use (Ref.)                              | 1                          | 1                    | 1                      | 1                    | 1                | 1                            |
| >0–4.9                                      | 0.79 (0.55-1.15)           | 1.01 (0.85-1.18)     | 0.76 (0.69-0.85)       | 0.89 (0.71-1.22)     | 0.74 (0.42-1.29) | 0.68 (0.39-1.19)             |
| 5.0–7.4                                     | 0.94 (0.66-1.35)           | 0.94 (0.79-1.11)     | 0.70 (0.59-0.83)       | 0.89 (0.61-1.29)     | 1.63 (1.08-2.48) | 1.43 (0.94-2.16)             |
| ≥7.5                                        | 0.79 (0.53-1.18)           | 0.86 (0.69-1.06)     | 1.00 (0.83-1.21)       | 1.19 (0.77-1.84)     | 2.17 (1.24-3.79) | 1.57 (0.76-3.25)             |
| <b>Overall cumulative dose category, mg</b> |                            |                      |                        |                      |                  |                              |
| Non-use (Ref.)                              | 1                          | 1                    | 1                      | 1                    | 1                | 1                            |
| >0–959.9                                    | 1.08 (0.98-1.18)           | 1.12 (1.04-1.21)     | 1.21 (1.11-1.31)       | 1.13 (0.96-1.33)     | 1.15 (0.97-1.38) | 1.06 (0.84-1.34)             |
| 960–3054.9                                  | 0.93 (0.83-1.05)           | 1.19 (1.07-1.32)     | 1.22 (1.13-1.33)       | 1.29 (1.08-1.55)     | 1.31 (1.02-1.70) | 1.23 (0.87-1.73)             |
| ≥3055                                       | 1.12 (1.02-1.23)           | 1.47 (1.37-1.59)     | 1.14 (1.07-1.21)       | 1.22 (1.07-1.39)     | 1.43 (1.18-1.72) | 1.44 (1.16-1.80)             |

\*Models were adjusted for age, index of multiple deprivation, non-oral glucocorticoids (inhaled, nasal, intramuscular, intra-articular, topical or rectal), comorbidities (cardiovascular disease, chronic kidney disease and scleroderma), type of chronic inflammatory diseases and time-variant flare status;

†Flare status defined as an increase in daily dose by >5mg, or a c-reactive protein measurement ≥10mg/mL, or an erythrocyte sedimentation rate ≥30mm/h

**Table 8. Time-variant prescribed prednisolone-equivalent dose of oral glucocorticoids and the risk of hypertension from mixed-effect models**

| Dose variables                              | HRs (95% CI)*       |
|---------------------------------------------|---------------------|
| <b>Daily dose category, mg</b>              |                     |
| Non-use (Ref.)                              | 1                   |
| >0–4.9                                      | 0.97 (0.90 to 1.05) |
| 5.0–7.4                                     | 1.02 (0.94 to 1.11) |
| ≥7.5                                        | 1.07 (1.01 to 1.14) |
| <b>Overall cumulative dose category, mg</b> |                     |
| Non-use (Ref.)                              | 1                   |
| >0–959.9                                    | 1.13 (1.08 to 1.18) |
| 960–3054.9                                  | 1.19 (1.13 to 1.26) |
| ≥3055                                       | 1.29 (1.24 to 1.33) |

\*Models were adjusted for age, index of multiple deprivation, non-oral glucocorticoid use (inhaled, nasal, intramuscular, intra-articular, topical or rectal), comorbidities (cardiovascular disease, chronic kidney disease and scleroderma) and type of chronic inflammatory disease,





**Table 9. Time-variant prescribed prednisolone-equivalent dose of oral glucocorticoids and the risk of hypertension when the 29,968 patients for whom the duration of their underlying chronic disease was  $\geq 3$  months**

| Dose                                        | HRs (95% CI)*    |
|---------------------------------------------|------------------|
| <b>Daily dose category, mg</b>              |                  |
| Non-use (Ref.)                              | 1                |
| >0–4.9                                      | 0.99 (0.88-1.12) |
| 5.0–7.4                                     | 0.97 (0.87-1.10) |
| $\geq 7.5$                                  | 0.91 (0.83-1.01) |
| <b>Overall cumulative dose category, mg</b> |                  |
| Non-use (Ref.)                              | 1                |
| >0–959.9                                    | 1.12 (1.03-1.22) |
| 960–3054.9                                  | 1.07 (0.98-1.18) |
| $\geq 3055$                                 | 1.31 (1.23-1.38) |

Note: Visits to specialists are more likely to happen around the time of diagnosis and medication prescribed during these outpatient visits was not available for the analysis. We therefore performed a sensitivity analysis including only patients who were diagnosed 3 months or more before the start of the study follow-up.

\*Models were adjusted for age, index of multiple deprivation, non-oral glucocorticoid use (inhaled, nasal, intramuscular, intra-articular, topical or rectal), comorbidities (cardiovascular disease, chronic kidney disease and scleroderma) and type of chronic inflammatory disease

**Figure 1. Study population flow chart**

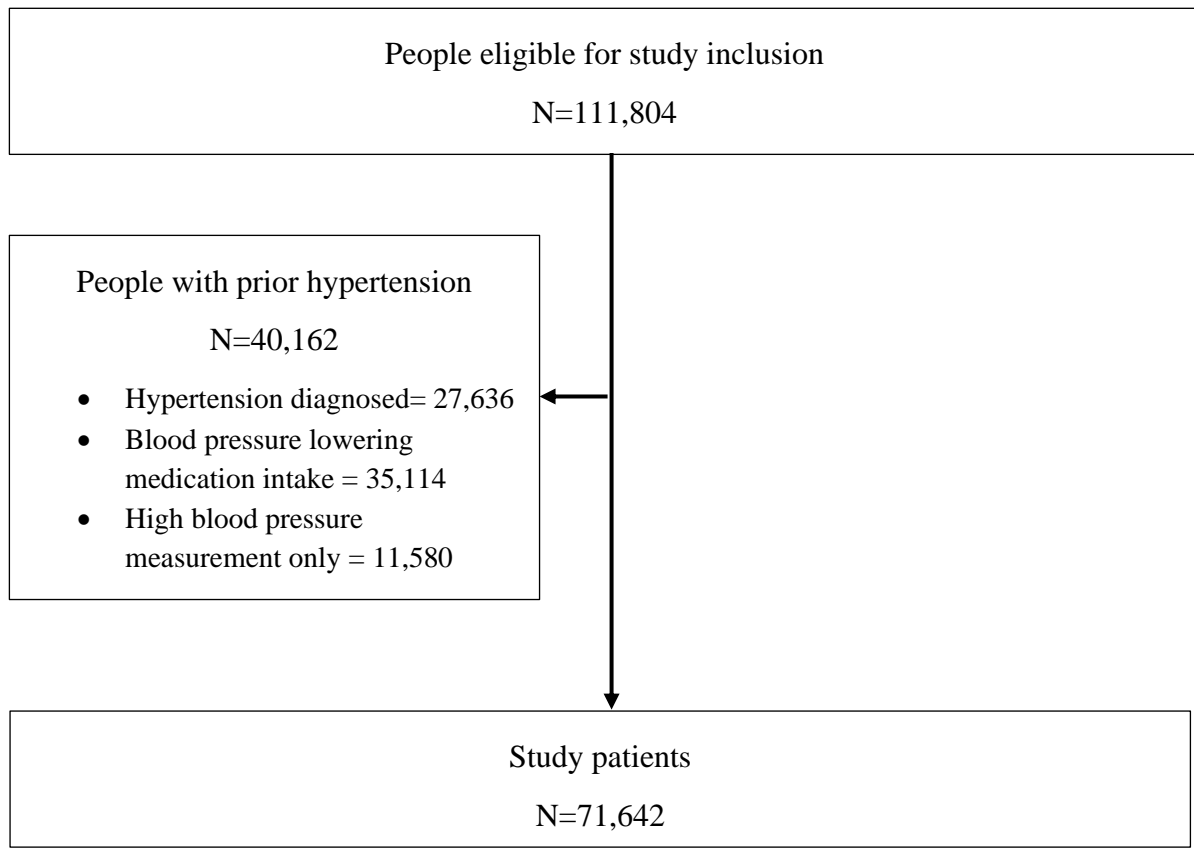



**Figure 2. Schematic view of confounding adjustment for investigating the effects of oral glucocorticoids on hypertension**

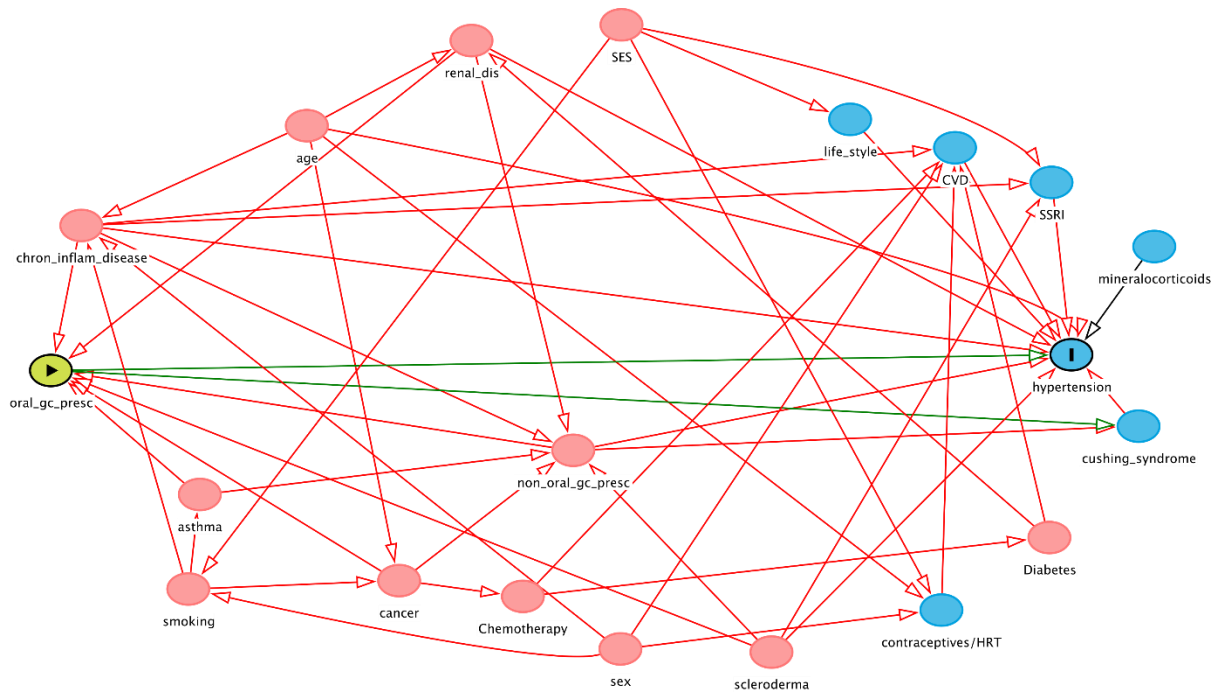

**Key:** , exposure; ,outcome; , ancestor of outcome; , ancestor of exposure *and* outcome ; ,causal path; , biasing path; chron\_inflam\_disease, Chronic inflammatory diseases (inflammatory bowel disease, systemic lupus erythematosus, polymyalgia rheumatica, giant cell arteritis, rheumatoid arthritis and vasculitis);CVD, cardio-vascular diseases, non\_oral\_gc\_presc, non-oral glucocorticoids prescribed; HRT, hormone replacement therapy; oral\_gc\_presc, oral glucocorticoids prescribed; renal\_dis, advanced chronic renal disease; SES, socioeconomic status; SSRI, Selective serotonin reuptake inhibitors.

This is the diagram and output obtained with the DAGitty software. Causal diagrams or directed acyclic graphs provide a graphical, yet mathematically rigorous methodology for minimising bias in epidemiology<sup>1</sup>. DAGitty is an open-source license software used to create, edit and analyse causal diagrams<sup>2</sup>. This software produces a list of minimally sufficient sets of variables to be used for confounding analysis. Adjustment for any of the sets listed would produce the same ‘unbiased’ results given the assumed causal relationships. The minimal sufficient adjustment sets identified for estimating the ‘unbiased’ causal effect of oral glucocorticoids on hypertension are listed below:

- a) CVD, SES, age, chron\_inflam\_disease, non\_oral\_gc\_presc, renal\_dis, scleroderma
- b) CVD, SSRI, age, chron\_inflam\_disease, life\_style, non\_oral\_gc\_presc, renal\_dis, scleroderma
- c) CVD, age, chron\_inflam\_disease, contraceptives/HRT, non\_oral\_gc\_presc, renal\_dis, scleroderma, sex, smoking
- d) Chemotherapy, SES, age, chron\_inflam\_disease, non\_oral\_gc\_presc, renal\_dis, scleroderma, sex
- e) Chemotherapy, SSRI, age, chron\_inflam\_disease, contraceptives/HRT, life\_style, non\_oral\_gc\_presc, renal\_dis, scleroderma, sex
- f) Chemotherapy, age, chron\_inflam\_disease, non\_oral\_gc\_presc, renal\_dis, scleroderma, smoking



- g) SES, age, cancer, chron\_inflam\_disease, non\_oral\_gc\_presc, renal\_dis, scleroderma, sex
- h) SSRI, age, cancer, chron\_inflam\_disease, contraceptives/HRT, life\_style, non\_oral\_gc\_presc, renal\_dis, scleroderma, sex
- i) asthma, cancer, chron\_inflam\_disease, non\_oral\_gc\_presc, renal\_dis, scleroderma
- j) cancer, chron\_inflam\_disease, non\_oral\_gc\_presc, renal\_dis, scleroderma, smoking

The adjustment set highlighted in blue was used in the analysis and was selected so as to ensure that it included variables that were available in the dataset (e.g. chemotherapy use was not) and that clinicians not familiar with the DAG approach would consider important for model adjustment, given current understanding of the pathophysiology of glucocorticoid-induced hypertension (e.g. age, chronic renal disease or scleroderma).

## SUPPLEMENTARY METHODS

### 1. Missing data estimation and dose correction

**The end date of every prescription of oral glucocorticoids and the dose prescribed to patients during tapering periods were not documented in electronic health records from primary care. The missing daily doses were therefore imputed.**

#### 1.1 Prescription end date and missing data estimation

For each prescription of oral glucocorticoids, the end date was calculated by adding the number of days covered by the prescription to the prescription issue date. The duration of each prescription was calculated as the total number of tablets prescribed divided by the daily dose. The maximum duration for any prescription was capped at 90 days as general practitioners are asked to prescribe medication for a period of less than 3 months.

A total number of 940,671 prescriptions were issued to study patients between 2 Jan 1997-23 March 2017 with a median of 20 prescriptions per patient (P25=8 and P75=46). The median time between prescriptions was 32 days (P25=23 and P75=56). The number of prescriptions with missing number of daily tablets and daily dose were 452,805 (48%) and 1,042 (0.11%), respectively. The median number of missing data per patient were 18 (P25=10 & and P75=42) and 30 (P25=14, P75=59) for number of tablets and daily doses, respectively. Missing data on prescribing was unrelated to GP practice (correlation coefficient obtained using an indicator variable for the missing prescription was 0.0029).

Missing data were imputed using truncated regression <sup>3</sup>, with specified lower and upper bound limits of 1 and 45, respectively, for daily dose; and 1 and 500, respectively, for the quantity prescribed. The number of datasets to be imputed was assumed to be at least 100 times the fraction of incomplete cases <sup>4</sup>. Hence, a total of 50 datasets were imputed. Each of the 50 datasets were analysed separately. Parameter estimates and their 95% CIs were then combined using Rubin rules <sup>5</sup>

The imputation was conducted under missing data at random assumption, that is, the data missingness was considered to be at random conditional on the variables included in imputation models <sup>4,6</sup>.

Variables included for imputation of missing daily doses and number of tables were as follows:

| Variable name | Variable type | Missing (%) | Imputation method  |
|---------------|---------------|-------------|--------------------|
| sex           | Binary        | 0           | Auxiliary variable |

|                                         |             |      |                             |
|-----------------------------------------|-------------|------|-----------------------------|
| Cardio-vascular disease                 | Binary      | 0    | Auxiliary variable          |
| Diabetes                                | Binary      | 0    | Auxiliary variable          |
| Inhaled glucocorticoid                  | Binary      | 0    | Auxiliary variable          |
| Intramuscular glucocorticoid            | Binary      | 0    | Auxiliary variable          |
| Nasal glucocorticoid                    | Binary      | 0    | Auxiliary variable          |
| Topical glucocorticoid                  | Binary      | 0    | Auxiliary variable          |
| Rectal glucocorticoid                   | Binary      | 0    | Auxiliary variable          |
| Chronic inflammatory disease type       | categorical | 0    | Auxiliary variable          |
| Duration of disease                     | continuous  | 0    | Auxiliary variable          |
| Daily oral prednisolone equivalent dose | continuous  | 48   | Truncated linear regression |
| Number of tablets                       | continuous  | 0.11 | Truncated linear regression |

## 1.2 Correction of oral glucocorticoid dose for tapering periods

To take into account oral glucocorticoid dose tapering, a number of rules were implemented:

- A.** Where only 1 prescription of  $\geq 10$  mg prednisolone equivalent dose (PED) for a maximum of 2 weeks was issued and there was no other prescription during the 2 months prior and after the date of prescription, it was assumed to be a glucocorticoid pulse dose. Hence, any zero doses before and after the glucocorticoid pulse prescription period were left unchanged (see snapshot below)

| Id | start | end | old_dose | new_dose | gap_days |
|----|-------|-----|----------|----------|----------|
| 1  | 1     | 80  | 0        | 0        | 80       |
| 1  | 80    | 87  | 40       | 40       | 7        |
| 1  | 87    | 287 | 0        | 0        | 200      |

- B.** Where a 0 dose gap (duration without prescribed glucocorticoids) was  $< 3$  days and the prescribed daily doses during the 2 months before and after the 0 dose gap were the same, the zero doses were left unchanged

| Id | start | end | Old_dose | new_dose | gap_days |
|----|-------|-----|----------|----------|----------|
| 2  | 1     | 14  | 5        | 5        | 14       |
| 2  | 14    | 21  | 0        | 2.5      | 7        |
| 2  | 21    | 24  | 0        | 0        | 3        |
| 2  | 24    | 36  | 5        | 5        | 14       |
| 2  | 36    | 42  | 5        | 5        | 7        |
| 2  | 42    | 49  | 0        | 2.5      | 7        |

C. Replacement of zero dose gaps

- i. Where a 0 dose gap was  $\leq 3$  months and there were  $\geq 4$  prescriptions issued every 2-4 months before the 0 dose gap, the total dose prescribed during the last prescription just before the 0 dose gap was divided by the duration of the last prescription and the 0 dose gap. For example, if the last prescription period was 14 days and the 0 dose gap (duration without a prescription) was 14 days, the total dose of the last prescription was divided into 28 days to obtain the average daily dose. The values of the last prescription and gap were then replaced by this average dose.

| Id | start | end | Old_dose | new_dose | gap_days |
|----|-------|-----|----------|----------|----------|
| 2  | 1     | 28  | 10       | 10       | 28       |
| 2  | 28    | 49  | 10       | 10       | 21       |
| 2  | 49    | 63  | 10       | 5        | 14       |
| 2  | 63    | 77  | 0        | 5        | 14       |
| 2  | 77    | 91  | 5        | 5        | 14       |
| 2  | 91    | 98  | 2.5      | 2.5      | 7        |

- ii. Where there were  $\geq 6$  prescriptions within 1 year and no 0 dose gaps of  $> 3$  months between prescriptions, and any 0 dose gaps of  $\leq 3$  months between prescriptions was followed by a minimum of 3 prescriptions in the next 7 months, the total dose prescribed during the last prescription just before the 0 dose gap was divided by the duration of the last prescription and the gap. The values of the last prescription and 0 dose gap were then replaced by this average dose.

| Id | start | end | Old_dose | new_dose | gap_days |
|----|-------|-----|----------|----------|----------|
| 3  | 1     | 28  | 10       | 10       | 28       |
| 3  | 28    | 49  | 10       | 10       | 21       |
| 3  | 49    | 63  | 10       | 10       | 14       |
| 3  | 63    | 77  | 7.5      | 7.5      | 14       |
| 3  | 77    | 91  | 7.5      | 7.5      | 14       |
| 3  | 91    | 98  | 7.5      | 7.5      | 14       |
| 3  | 98    | 119 | 0        | 5        | 21       |
| 3  | 119   | 140 | 5        | 5        | 21       |
| 3  | 140   | 161 | 5        | 5        | 21       |
| 3  | 161   | 175 | 2.5      | 2.5      | 14       |

- iii. Where a 0 dose gap was of  $>3$  days and there was a minimum of 1 prescription of oral glucocorticoids in the previous  $\geq 2$  weeks and within the next 3 months of the 0 dose gap period, the 0 dose values were replaced with the daily dose of last prescription before 0 dose gap period.

| Id | start | end | Old_dose | new_dose | gap_days |
|----|-------|-----|----------|----------|----------|
| 4  | 1     | 28  | 10       | 10       | 28       |
| 4  | 28    | 49  | 10       | 10       | 21       |
| 4  | 49    | 63  | 0        | 10       | 14       |
| 4  | 63    | 77  | 7.5      | 7.5      | 14       |
| 4  | 77    | 91  | 7.5      | 7.5      | 14       |
| 4  | 91    | 98  | 7.5      | 7.5      | 14       |

#### D. Dose tapering for patients who received GCs for $\geq 6$ months

- i. Where a daily dose decreased suddenly from between  $\geq 31$ mg and  $\leq 40$ mg to  $< 10$ mg, the duration of the last prescription was divided into 5 periods and the patient was assumed to have taken a prescribed dose of between  $\geq 31$ mg and  $\leq 40$ mg (same as recorded-), 30mg, 20mg, 10mg and 5mg during the first, second, third, fourth and fifth period, respectively.

| Id | start | end | old_dose | new_dose | gap_days |
|----|-------|-----|----------|----------|----------|
| 4  | 147   | 161 | 40       | 40       | 14       |
| 4  | 161   | 168 | 0        | 40       | 7        |
| 4  | 168   | 182 | 40       | 40       | 14       |
| 4  | 182   | 189 | 40       | 40       | 7        |
| 4  | 189   | 196 | 40       | 30       | 7        |
| 4  | 196   | 203 | 40       | 20       | 7        |
| 4  | 203   | 210 | 40       | 10       | 7        |
| 4  | 210   | 217 | 40       | 5        | 7        |
| 4  | 217   | 224 | 5        | 5        | 7        |

- ii. Where a daily dose decreased suddenly from between  $\geq 21\text{mg}$  and  $< 31\text{mg}$  to  $< 10\text{mg}$ , the duration of the last prescription was divided into 4 periods and the patient was assumed to have taken a prescribed dose between  $\geq 21\text{mg}$  and  $< 31\text{mg}$  (same as recorded), 20mg, 10mg and 5mg during the first, second, third and fourth period, respectively.

| Id | start | end | old_dose | new_dose | gap_days |
|----|-------|-----|----------|----------|----------|
| 5  | 147   | 161 | 25       | 25       | 14       |
| 5  | 161   | 168 | 0        | 25       | 7        |
| 5  | 168   | 182 | 25       | 25       | 14       |
| 5  | 182   | 189 | 25       | 25       | 7        |
| 5  | 189   | 196 | 25       | 20       | 7        |
| 5  | 196   | 203 | 25       | 10       | 7        |
| 5  | 203   | 210 | 5        | 5        | 7        |
| 5  | 210   | 217 | 5        | 5        | 7        |

- iii. Where a daily dose decreased suddenly from between  $\geq 15\text{mg}$  and  $< 21\text{mg}$  to  $< 10\text{mg}$ , the duration of the last prescription was divided into 3 periods and the patient was assumed to have taken a prescribed dose between  $\geq 15\text{mg}$  and  $< 21\text{mg}$  (same as recorded), 10mg and 5mg during the first, second and third period, respectively.

| Id | start | end | old_dose | new_dose | gap_days |
|----|-------|-----|----------|----------|----------|
| 6  | 168   | 182 | 15       | 15       | 14       |
| 6  | 182   | 189 | 15       | 15       | 7        |
| 6  | 189   | 196 | 15       | 10       | 7        |
| 6  | 196   | 203 | 15       | 5        | 7        |
| 6  | 203   | 210 | 5        | 5        | 7        |

- iv. Where a daily dose decreased suddenly from between  $\geq 10\text{mg}$  and  $< 15\text{mg}$  to  $< 5\text{mg}$  and the patient received 5mg and 2.5mg tablets, the duration of the last prescription was divided into 4 periods and the patient was assumed to have taken a prescribed dose between  $\geq 10\text{mg}$  and  $< 15\text{mg}$  (same as recorded), 10mg, 7.5mg and 5mg during the first, second, third and fourth period, respectively.

| Id | start | end | old_dose | new_dose | gap_days |
|----|-------|-----|----------|----------|----------|
| 7  | 189   | 196 | 12.5     | 12.5     | 7        |
| 7  | 196   | 203 | 12.5     | 12.5     | 7        |
| 7  | 203   | 210 | 12.5     | 10       | 7        |
| 7  | 210   | 217 | 12.5     | 7.5      | 7        |
| 7  | 217   | 224 | 12.5     | 5        | 7        |
| 7  | 224   | 231 | 2.5      | 2.5      | 7        |

- v. Where a daily dose decreased suddenly from between  $\geq 10\text{mg}$  and  $< 15\text{mg}$  to  $< 5\text{mg}$  and the patient received only 5mg tablets, the duration of the last prescription was divided into 3 periods and the patient was assumed to have taken a prescribed dose between  $\geq 10\text{mg}$  and  $< 15\text{mg}$  (same as recorded), 10mg and 5mg during the first, second and third period, respectively.

| Id | start | end | old_dose | new_dose | gap_days |
|----|-------|-----|----------|----------|----------|
| 8  | 189   | 196 | 10       | 10       | 7        |
| 8  | 196   | 203 | 10       | 10       | 7        |
| 8  | 203   | 210 | 10       | 10       | 7        |
| 8  | 210   | 217 | 10       | 5        | 7        |
| 8  | 217   | 224 | 2.5      | 2.5      | 7        |

- vi. Where a daily dose decreased suddenly from between  $\geq 5\text{mg}$  and  $< 10\text{mg}$  to  $\leq 2\text{mg}$ , the duration of the last prescription was divided into 3 periods and the patient was assumed to have taken a prescribed dose between  $\geq 5\text{mg}$  and  $< 10\text{mg}$  (same as recorded), 5mg and 2.5mg during the first, second and third period, respectively.

| Id | start | end | old_dose | new_dose | gap_days |
|----|-------|-----|----------|----------|----------|
| 9  | 189   | 196 | 7.5      | 7.5      | 7        |
| 9  | 196   | 203 | 7.5      | 7.5      | 7        |
| 9  | 203   | 210 | 7.5      | 5        | 7        |
| 9  | 210   | 217 | 7.5      | 2.5      | 7        |
| 9  | 217   | 224 | 1        | 1        | 7        |

## 2. Immortal time bias, time-variant covariates and cumulative doses

### 2.1. Immortal time bias

The snapshot below shows that patient 1 entered the study on 15<sup>th</sup> September 2001 but received first oral glucocorticoid on the 6<sup>th</sup> March, 2013. Quite often, the start of the follow-up for each patient is inadvertently assumed to be the date when the first medication is issued<sup>7,8</sup>. Not including the duration before the start of medication, however, leads to the so called immortal time bias<sup>9</sup> due to underestimation of the person-time contributed by the patient. In order to minimise this type of bias, both the exposure and non-exposure periods between the study start and end dates were therefore accounted for. Patient 1 was observed but not exposed during the periods between 15<sup>th</sup> September 2001 and 6<sup>th</sup> March 2013, and between 11<sup>th</sup> March 2013 and 24<sup>th</sup> November 2014) so the value of daily glucocorticoid dose was 0. The total person-time contributed by the patients to the study was approximately 14 years (i.e. time between 15<sup>th</sup> September 2001 and 8<sup>th</sup> June 2015).

### 2.2 Time-variant covariates

Time-variant covariates (e.g. daily glucocorticoid dose and chronic inflammatory disease) were constructed to reflect the status of a person in relation to a particular variable (e.g. chronic inflammatory disease status) at every follow-up point and would have a value of 0 (No) or 1 (Yes). For example, on the snapshot below, patient 1 was diagnosed for inflammatory disease on 24/11/2014. Therefore, the follow-up periods before and after the diagnosis date were assigned the value of 0 (No) and 1(Yes), respectively.

### 2.3 Cumulative doses construction

In constructing the cumulative dose variable, daily PEDs were cumulated throughout the entire follow-up period starting from one year before the study start date. For example, patient 1 only started to receive oral glucocorticoids on the 6<sup>th</sup> March 2013 and the daily PEDs were therefore cumulated from this point until the end of follow-up (i.e. 8<sup>th</sup> June 2015).



| Id | start_dt    | end_dt      | disease_dt  | infla_disease | daily_PED | overall_cum |
|----|-------------|-------------|-------------|---------------|-----------|-------------|
| 1  | 15 Sep 2001 | 6 Mar 2013  | 24 Nov 2014 | No            | 0         | 0           |
| 1  | 6 Mar 2013  | 11 Mar 2013 | 24 Nov 2014 | No            | 30        | 150         |
| 1  | 11 Mar 2013 | 24 Nov 2014 | 24 Nov 2014 | No            | 0         | 150         |
| 1  | 24 Nov 2014 | 17 Dec 2014 | 24 Nov 2014 | Yes           | 16        | 517         |
| 1  | 17 Dec 2014 | 25 Dec 2014 | 24 Nov 2014 | Yes           | 16        | 655         |
| 1  | 25 Dec 2014 | 3 Jan 2015  | 24 Nov 2014 | Yes           | 10        | 742         |
| 1  | 3 Jan 2015  | 12 Jan 2015 | 24 Nov 2014 | Yes           | 5         | 785         |
| 1  | 12 Jan 2015 | 13 Jan 2015 | 24 Nov 2014 | Yes           | 5         | 790         |
| 1  | 13 Jan 2015 | 10 Feb 2015 | 24 Nov 2014 | Yes           | 18        | 1287        |
| 1  | 10 Feb 2015 | 23 Feb 2015 | 24 Nov 2014 | Yes           | 18        | 1517        |
| 1  | 23 Feb 2015 | 4 Mar 2015  | 24 Nov 2014 | Yes           | 16        | 1666        |
| 1  | 4 Mar 2015  | 13 Mar 2015 | 24 Nov 2014 | Yes           | 10        | 1759        |
| 1  | 13 Mar 2015 | 23 Mar 2015 | 24 Nov 2014 | Yes           | 5         | 1806        |
| 1  | 23 Mar 2015 | 30 Mar 2015 | 24 Nov 2014 | Yes           | 3         | 1827        |
| 1  | 30 Mar 2015 | 3 Apr 2015  | 24 Nov 2014 | Yes           | 17        | 1904        |
| 1  | 3 Apr 2015  | 8 Apr 2015  | 24 Nov 2014 | Yes           | 10        | 1951        |
| 1  | 8 Apr 2015  | 13 Apr 2015 | 24 Nov 2014 | Yes           | 5         | 1974        |
| 1  | 13 Apr 2015 | 29 Apr 2015 | 24 Nov 2014 | Yes           | 3         | 2022        |
| 1  | 29 Apr 2015 | 4 Jun 2015  | 24 Nov 2014 | Yes           | 2.5       | 2113        |
| 1  | 4 Jun 2015  | 8 Jun 2015  | 24 Nov 2014 | Yes           | 12        | 2160        |
| 2  | 1 Jan 1998  | 27 Jul 1998 | 6 Aug 1998  | No            | 0         | 0           |
| 2  | 27 Jul 1998 | 6 Aug 1998  | 6 Aug 1998  | No            | 30        | 300         |
| 2  | 6 Aug 1998  | 20 Aug 1998 | 6 Aug 1998  | Yes           | 25        | 650         |

Note: Id, patient identification number; start\_dt, start date; end\_dt, end date; disease\_dt, date of inflammatory disease; infla\_disease, inflammatory disease; daily\_PED, daily prednisolone equivalent dose; overall\_cum, cumulative PED.

## 2.4 Definition of disease flares

To account for possible variation in the incidence rate of hypertension during instances of disease flares, a time-variant variable was constructed based on blood levels of c-reactive protein (CRP) and erythrocyte sedimentation rate (ESR), and changes in daily doses of oral glucocorticoids<sup>10</sup>. Briefly, CRP and ESR measurements were not used in defining disease activity for patients with systemic lupus erythematosus and vasculitis, as flares can occur without increase in these biomarkers. An increase of daily dose by >5mg (or >10mg) lasting 3 weeks or a CRP value of  $\geq 10$ mg/mL or an ESR value of  $\geq 30$ mm/h indicated active disease (flare). If the daily dose was reduced to <5mg (or <10mg) and/or measurement of CRP and ESR were <10mg/mL and <30mm/h, respectively, the disease was assumed to be inactive (no flare).

## References

1. Greenland S, Pearl J, Robins JM. Causal diagrams for epidemiologic research. *Epidemiology*. 1999;10:37-48.
2. Textor J, Hardt J, Knoppel S. DAGitty: a graphical tool for analyzing causal diagrams. *Epidemiology*. 2011;22:745.
3. Raghunathan TE, Lepkowski JM, Van Hoewyk J, Solenberger P. A multivariate technique for multiply imputing missing values using a sequence of regression models. *Survey methodology*. 2001;27:85-96.
4. White IR, Royston P, Wood AM. Multiple imputation using chained equations: Issues and guidance for practice. *Statistics in medicine*. 2011;30:377-99.
5. Rubin DB. *Multiple imputation for nonresponse in surveys*. Vol 81: John Wiley & Sons; 2004.
6. Graham JW. Missing Data Analysis: Making It Work in the Real World. *Annual Review of Psychology*. 2008;60:549-76.
7. Donahue JG, Weiss ST, Livingston JM, Goetsch MA, Greineder DK, Platt RJJ. Inhaled steroids and the risk of hospitalization for asthma. 1997;277:887-91.
8. Adams RJ, Fuhlbrigge A, Finkelstein JA, et al. Impact of inhaled antiinflammatory therapy on hospitalization and emergency department visits for children with asthma. 2001;107:706-11.
9. Suissa S. Immortal time bias in pharmaco-epidemiology. *American journal of epidemiology*. 2008;167:492-9.
10. Pujades-Rodriguez M, Morgan AW, Cubbon RM, Wu J. Dose-dependent oral glucocorticoid cardiovascular risk in people with immune-mediated inflammatory diseases. *Submitted*. 2019.
